# Supplementary material for: Use of medicine pricing and reimbursement policies for universal health coverage in Indonesia
Source: PubMed Central journal article supplement (PMC6380537; doi:10.1371/journal.pone.0212328), 2019-02-19
Supplement: pone.0212328.s003.pdf [file pone.0212328.s003.pdf]

**S2 Table.** Overview of recruitment process

| TYPES OF STAKEHODERS        | Send Letter | Respons   | Interviews | Cancel after receiving list of questions | Stop The interview | No times available | Not response |
|-----------------------------|-------------|-----------|------------|------------------------------------------|--------------------|--------------------|--------------|
| WHO members                 | 2           | 2         | 1          | 0                                        |                    | 1                  | 0            |
| HTA Committee               | 3           | 2         | 2          | 0                                        |                    |                    | 1            |
| NF Committee                | 3           | 1         | 1          | 0                                        |                    |                    | 2            |
| BPJS Kesehatan (NHI Agency) | 3           | 3         | 2          | 0                                        |                    | 1                  | 0            |
| Pharmaceutical Industry     | 4           | 3         | 1          | 0                                        |                    | 2                  | 1            |
| Physicians                  | 12          | 10        | 6          | 1                                        | 3                  |                    | 2            |
| Pharmacist                  | 15          | 15        | 6          | 5                                        | 4                  |                    | 0            |
| Patients                    | 9           | 9         | 6          | 3                                        |                    |                    | 0            |
| <b>TOTAL</b>                | <b>51</b>   | <b>45</b> | <b>25</b>  | <b>9</b>                                 | <b>7</b>           | <b>4</b>           | <b>6</b>     |
